# Supplementary material
Source: PubMed Central journal article supplement (PMC2755886)
Supplement: supp_M109.005603_Suppdata.pdf [file supp_M109.005603_Suppdata.pdf]

**Supplementary movie legends Supplementary movie 1.** Time-lapse movie showing representative phagocytic behavior of MG5 cells. Time-lapse images were acquired every 8 min for 36 h with an Olympus IX81 microscope using a 10· objective lens. When MG5 cells were co-cultured, the area without debris was increased in the distal part of the injury site. This live imaging showed that MG5 cells started to clear debris at approximately 15 h; they became highly motile afterwards.
